# Supplementary material
Source: Elsevier journal article supplement (https://www.sciencedirect.com/science/article/pii/S1888989122000362)
Supplement: mmc1 [file S1888989122000362:mmc1.doc]

**Supplementary** **Table 1.** Principal Component Analysis (PCA) for cognitive variables

| **Cognitive domain** | **Neuropsychological assessment** | **Pattern coefficients** | | | | | | | | **Structure coefficients** | | | | | | | | **Commu-nalities** |
| --- | --- | --- | --- | --- | --- | --- | --- | --- | --- | --- | --- | --- | --- | --- | --- | --- | --- | --- |
| **1** | **2** | **3** | **4** | **5** | **6** | **7** | **8** | **1** | **2** | **3** | **4** | **5** | **6** | **7** | **8** |
| **Verbal memory** | Long Delay Cued Recall (CVLT) | **0.922** | 0.011 | -0.013 | -0.018 | 0.065 | 0.031 | -0.129 | 0.085 | **0.948** | 0.083 | 0.133 | 0.283 | -0.192 | -0.421 | -0.370 | 0.393 | 0.924 |
| Long Delay Free Recall (CVLT) | **0.886** | 0.001 | -0.028 | -0.049 | 0.040 | -0.024 | -0.186 | 0.047 | **0.937** | 0.040 | 0.166 | 0.324 | -0.279 | -0.459 | -0.275 | 0.440 | 0.909 |
| Short Delay Cued Recall (CVLT) | **0.875** | -0.031 | 0.025 | 0.028 | -0.017 | 0.004 | -0.020 | 0.128 | **0.933** | 0.082 | 0.134 | 0.265 | -0.214 | -0.459 | -0.420 | 0.367 | 0.897 |
| Short Delay Free Recall (CVLT) | **0.852** | 0.077 | -0.031 | 0.081 | -0.002 | -0.080 | -0.060 | -0.010 | **0.928** | 0.160 | 0.143 | 0.386 | -0.271 | -0.512 | -0.326 | 0.325 | 0.887 |
| Total A5 (CVLT) | **0.756** | -0.083 | 0.139 | 0.068 | -0.162 | -0.120 | 0.270 | -0.154 | **0.766** | -0.012 | 0.288 | 0.305 | -0.358 | -0.462 | 0.021 | 0.150 | 0.737 |
| **Sustained attention** | Commissions (CPT-II) | 0.000 | **0.965** | 0.024 | 0.024 | 0.095 | -0.001 | 0.085 | -0.027 | 0.029 | **0.947** | 0.067 | 0.076 | -0.012 | -0.014 | -0.034 | -0.095 | 0.916 |
| Detectability (d') (CPT-II) | -0.063 | **0.950** | -0.005 | 0.021 | 0.023 | -0.020 | 0.014 | -0.007 | 0.012 | **0.944** | 0.050 | 0.085 | -0.080 | -0.043 | -0.097 | -0.063 | 0.895 |
| Hit RT (CPT-II) | -0.061 | **-0.715** | -0.050 | 0.076 | 0.346 | 0.071 | 0.201 | 0.022 | -0.269 | **-0.789** | -0.207 | -0.124 | 0.483 | 0.290 | 0.358 | -0.083 | 0.839 |
| **Executive function (planning)** | Total correct (TOL) | 0.103 | 0.119 | **0.957** | 0.043 | 0.063 | 0.192 | 0.099 | 0.098 | 0.186 | 0.162 | **0.920** | 0.057 | -0.101 | -0.033 | -0.031 | -0.005 | 0.905 |
| Total move (TOL) | -0.049 | -0.055 | **0.857** | -0.142 | -0.088 | -0.190 | -0.054 | 0.010 | 0.174 | 0.018 | **0.895** | -0.035 | -0.267 | -0.321 | -0.176 | -0.002 | 0.857 |
| Execution time (TOL) | -0.006 | -0.073 | **0.490** | 0.089 | -0.085 | -0.349 | -0.376 | -0.172 | 0.323 | 0.056 | **0.626** | 0.265 | -0.297 | -0.533 | -0.514 | -0.030 | 0.734 |
| **Visual memory** | Total Immediate Recall (WMS) | -0.076 | -0.057 | 0.001 | **0.960** | -0.029 | -0.037 | 0.040 | 0.018 | 0.240 | 0.022 | 0.035 | **0.944** | -0.191 | -0.305 | -0.103 | 0.148 | 0.902 |
| Total Delay Recall (WMS) | 0.139 | 0.106 | -0.103 | **0.792** | -0.042 | -0.064 | -0.102 | 0.036 | 0.458 | 0.201 | -0.005 | **0.890** | -0.259 | -0.413 | -0.294 | 0.242 | 0.866 |
| **Executive function (Inhibition)** | Stroop interference | -0.017 | 0.010 | -0.015 | 0.065 | **-0.976** | 0.076 | 0.014 | 0.070 | 0.238 | 0.120 | 0.138 | 0.224 | **-0.972** | -0.283 | -0.090 | 0.285 | 0.956 |
| **Working memory** | Digits (WAIS-III) | 0.047 | 0.014 | -0.057 | 0.110 | 0.022 | **-0.820** | -0.018 | 0.128 | 0.497 | 0.070 | 0.097 | 0.398 | -0.313 | **-0.898** | -0.253 | 0.381 | 0.845 |
| Letter-Number Sequencing (WAIS-III) | 0.169 | 0.136 | 0.109 | 0.139 | 0.011 | **-0.687** | 0.007 | 0.051 | 0.573 | 0.209 | 0.272 | 0.429 | -0.339 | **-0.846** | -0.263 | 0.299 | 0.805 |
| **Processing speed** | TMT-A | 0.292 | 0.035 | -0.027 | 0.106 | -0.023 | -0.006 | **-0.739** | 0.093 | 0.563 | 0.161 | 0.122 | 0.339 | -0.224 | -0.383 | **-0.851** | 0.305 | 0.868 |
| **Verbal fluency** | Phonemic (F‐A‐S) | 0.008 | -0.065 | 0.192 | 0.144 | -0.066 | -0.024 | -0.081 | **0.837** | 0.418 | -0.050 | 0.168 | 0.305 | -0.337 | -0.370 | -0.235 | **0.882** | 0.871 |
| Categorical (Animal naming) | 0.168 | -0.012 | -0.189 | -0.143 | -0.155 | -0.358 | 0.094 | **0.606** | 0.481 | -0.019 | -0.127 | 0.114 | -0.392 | -0.548 | -0.078 | **0.777** | 0.808 |

Abbreviations: CVLT=California Verbal Learning Test; WMS= Wechsler Memory Scale; TOL= Tower of London; CPT-II= Continuous Performance Test–II; RT=Reaction Time; WAIS-III= Wechsler Adult Intelligence Scale; TMT-A= Trail making test (Form A). The 19 neuropsychological variables were subjected to principal components analysis (PCA) using SPSS version 25. The Kaiser-Meyer-Olkin value was 0.768, exceeding the recommended value of 0.6 and Bartlett’s Test of Sphericity reached statistical significance, supporting the factorability of the correlation matrix. Principal components analysis revealed the presence of seven components with eigenvalues exceeding 1, explaining 38.16%, 13.32%, 10.23%, 7.61%, 6.25%, 3.99%, 3.55% and 3.32% of the variance respectively. The rotated solution revealed the presence of simple structure with seven components showing a number of strong loadings.
